# Supplementary material for: Impact of Mg and Ti doping in O3 type NaNi1/2Mn1/2O2 on reversibility and phase transition during electrochemical Na intercalation
Source: Royal Society of Chemistry journal article supplement (doi:10.1039/d1ta01164b), 2021-01-01
Supplement: d1ta01164b1.pdf [file d1ta01164b1.pdf]

*Electronic Supplementary Information for*

**Impact of Mg and Ti Doping in O3 Type  $\text{NaNi}_{1/2}\text{Mn}_{1/2}\text{O}_2$  on Reversibility and Phase Transition During Electrochemical Na Intercalation**

Kei Kubota,<sup>a,b</sup> Naoya Fujitani,<sup>a</sup> Yusuke Yoda,<sup>a</sup> Kazutoshi Kuroki,<sup>a</sup>  
Yusuke Tokita<sup>a</sup> and Shinichi Komaba<sup>\*a,b</sup>

<sup>a</sup>. *Department of Applied Chemistry, Tokyo University of Science, 1-3 Kagurazaka, Shinjuku-ku, Tokyo 162-8601, Japan.*

<sup>b</sup>. *Elements Strategy Initiative for Catalysts and Batteries (ESICB), Kyoto University, 1-30 Goryo-Ohara, Nishikyo-ku, Kyoto 615-8245, Japan.*

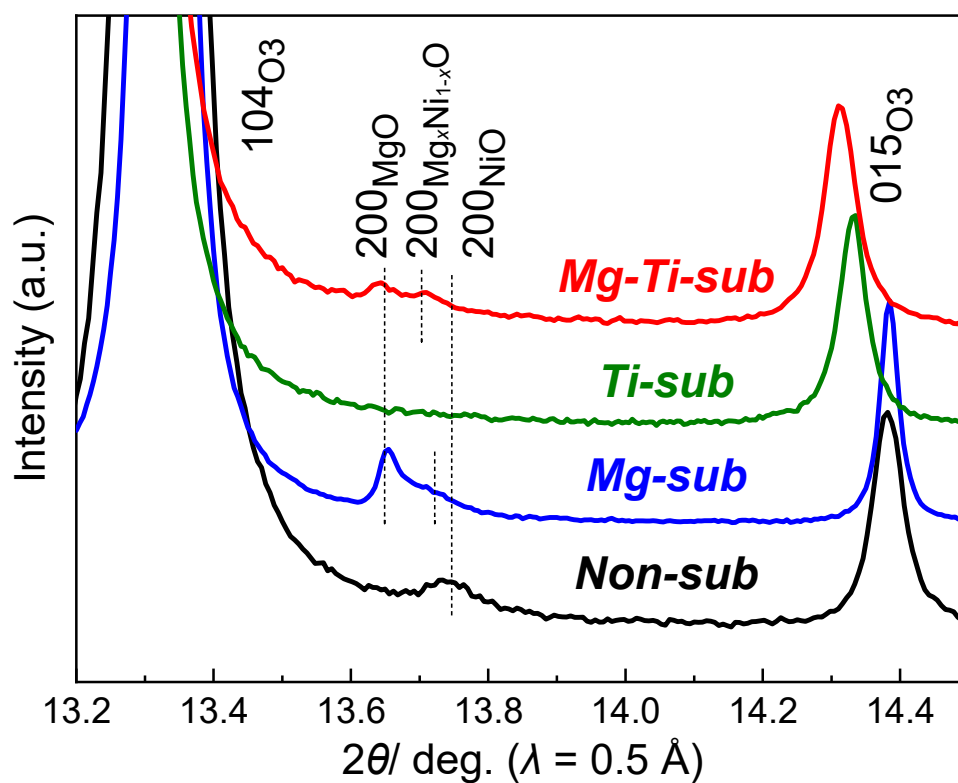

Figure S1 Magnified synchrotron powder XRD patterns of pristine  $\text{Na}[\text{Ni}_{1/2}\text{Mn}_{1/2}]\text{O}_2$  (Non-sub),  $\text{Na}[\text{Ni}_{4/9}\text{Mn}_{1/2}\text{Mg}_{1/18}]\text{O}_2$  (Mg-sub),  $\text{Na}[\text{Ni}_{1/2}\text{Mn}_{1/3}\text{Ti}_{1/6}]\text{O}_2$  (Ti-sub), and  $\text{Na}[\text{Ni}_{4/9}\text{Mn}_{1/3}\text{Mg}_{1/18}\text{Ti}_{1/6}]\text{O}_2$  (Mg-Ti-sub) in the diffraction angle range of  $13.2^\circ - 14.5^\circ$ . The patterns in a wider-angle range are shown in Figure 1(a).

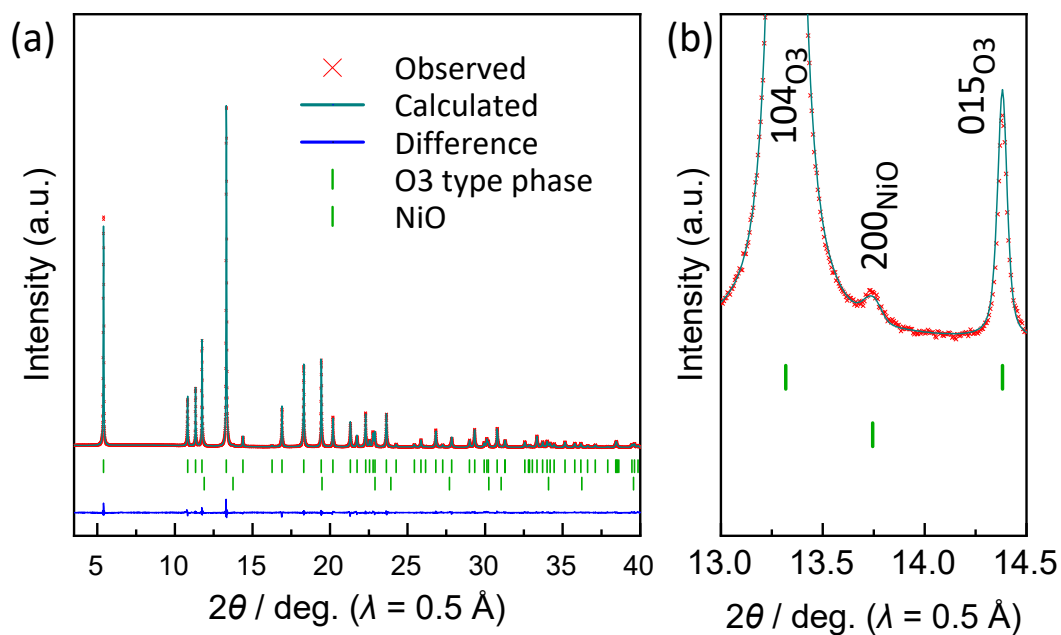

Figure S2 (a) Rietveld refinement results on the synchrotron XRD pattern of as-prepared Non-sub. (b) Magnified patterns in the diffraction angle range of 13.0° – 14.5°.

Table S1 Refined structural parameters of as-prepared Non-sub by Rietveld method on the synchrotron XRD pattern.

$$R_{wp} = 4.57\%, R_e = 2.36\%$$

1<sup>st</sup> phase: 99.8 mass%

Space group:  $R\bar{3}m$

$$a = 2.96277(4) \text{ \AA}, c = 15.9132(2) \text{ \AA}, V = 120.972(3) \text{ \AA}^3$$

$$R_B = 0.82\%, R_F = 0.65\%$$

| Atom | Wyckoff site | x | y | z          | G        | B / $\text{\AA}^2$ |
|------|--------------|---|---|------------|----------|--------------------|
| Na   | 3b           | 0 | 0 | 1/2        | 0.909(2) | 0.60(3)            |
| Ni   | 3a           | 0 | 0 | 0          | 1/2      | 0.389(7)           |
| Mn   | 3a           | 0 | 0 | 0          | 1/2      | = B(Ni)            |
| O    | 6c           | 0 | 0 | 0.26791(5) | 1.0      | 0.89(2)            |

2<sup>nd</sup> phase: 0.2 mass%

Space group:  $Fm\bar{3}m$

$$a = 4.1793(7) \text{ \AA}, V = 73.00(2) \text{ \AA}^3$$

$$R_B = 0.93\%, R_F = 0.67\%$$

| Atom | Wyckoff site | x   | y   | z   | G   | B / $\text{\AA}^2$ |
|------|--------------|-----|-----|-----|-----|--------------------|
| Ni   | 4a           | 0   | 0   | 0.0 | 1.0 | 0.3                |
| O    | 4b           | 1/2 | 1/2 | 1/2 | 1.0 | 0.4                |

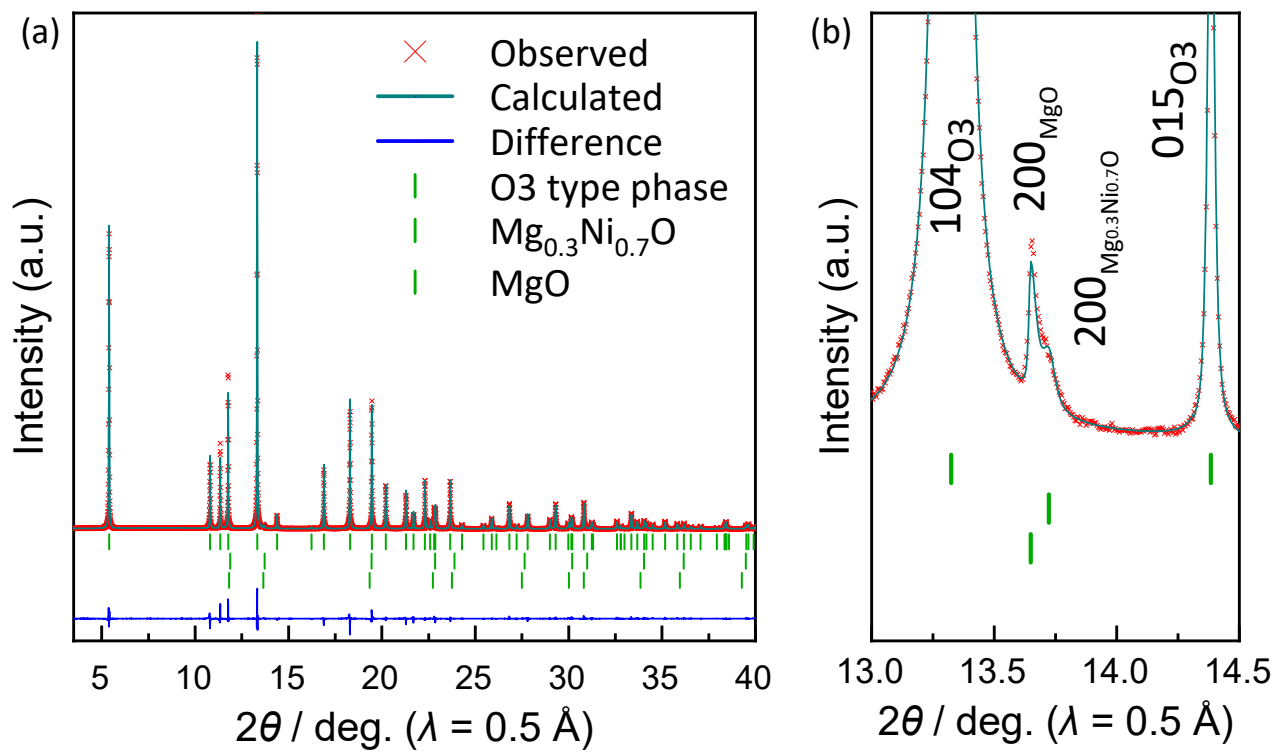

Figure S3 (a) Rietveld refinement results on the synchrotron XRD pattern of as-prepared Mg-sub. (b) Magnified patterns in the diffraction angle range of  $13.0^\circ - 14.5^\circ$ .

Table S2 Refined structural parameters of as-prepared Mg-sub by Rietveld method on the synchrotron XRD pattern.

| $R_{wp} = 6.50\%$ , $R_e = 1.88\%$                                                              |              |     |     |            |            |                    |
|-------------------------------------------------------------------------------------------------|--------------|-----|-----|------------|------------|--------------------|
| 1 <sup>st</sup> phase: 98.77 mass%                                                              |              |     |     |            |            |                    |
| Space group: $R\bar{3}m$                                                                        |              |     |     |            |            |                    |
| $a = 2.95958(2) \text{ \AA}$ , $c = 15.94768(8) \text{ \AA}$ , $V = 120.9731(12) \text{ \AA}^3$ |              |     |     |            |            |                    |
| $R_B = 1.50\%$ , $R_F = 0.98\%$                                                                 |              |     |     |            |            |                    |
| Atom                                                                                            | Wyckoff site | x   | y   | z          | g          | B / $\text{\AA}^2$ |
| Na                                                                                              | 3b           | 0   | 0   | 1/2        | 0.890(2)   | 0.75(2)            |
| Ni                                                                                              | 3a           | 0   | 0   | 0          | 4/9        | 0.354(6)           |
| Mn                                                                                              | 3a           | 0   | 0   | 0          | 1/2        | = B(Ni)            |
| Mg                                                                                              | 3a           | 0   | 0   | 0          | 1/18       | = B(Ni)            |
| O                                                                                               | 6c           | 0   | 0   | 0.26836(5) | 1.0        | 0.99(2)            |
| 2 <sup>nd</sup> phase: 0.78 mass%                                                               |              |     |     |            |            |                    |
| Space group: $Fm\bar{3}m$                                                                       |              |     |     |            |            |                    |
| $a = 4.1873(6) \text{ \AA}$ , $V = 73.420(18) \text{ \AA}^3$                                    |              |     |     |            |            |                    |
| $R_B = 1.31\%$ , $R_F = 0.89\%$                                                                 |              |     |     |            |            |                    |
| Atom                                                                                            | Wyckoff site | x   | y   | z          | g          | B / $\text{\AA}^2$ |
| Mg                                                                                              | 4a           | 0   | 0   | 0.0        | 0.69(11)   | 0.3                |
| Ni                                                                                              | 4a           | 0   | 0   | 0.0        | = 1- g(Mg) | 0.3                |
| O                                                                                               | 4b           | 1/2 | 1/2 | 1/2        | 1.0        | 0.4                |
| 3 <sup>rd</sup> phase: 0.45 mass%                                                               |              |     |     |            |            |                    |
| Space group: $Fm\bar{3}m$                                                                       |              |     |     |            |            |                    |
| $a = 4.2099(2) \text{ \AA}$ , $V = 74.613(7) \text{ \AA}^3$                                     |              |     |     |            |            |                    |
| $R_B = 1.31\%$ , $R_F = 0.43\%$                                                                 |              |     |     |            |            |                    |
| Atom                                                                                            | Wyckoff site | x   | y   | z          | g          | B / $\text{\AA}^2$ |
| Mg                                                                                              | 4a           | 0   | 0   | 0.0        | 1.0        | 0.3                |
| O                                                                                               | 4b           | 1/2 | 1/2 | 1/2        | 1.0        | 0.4                |

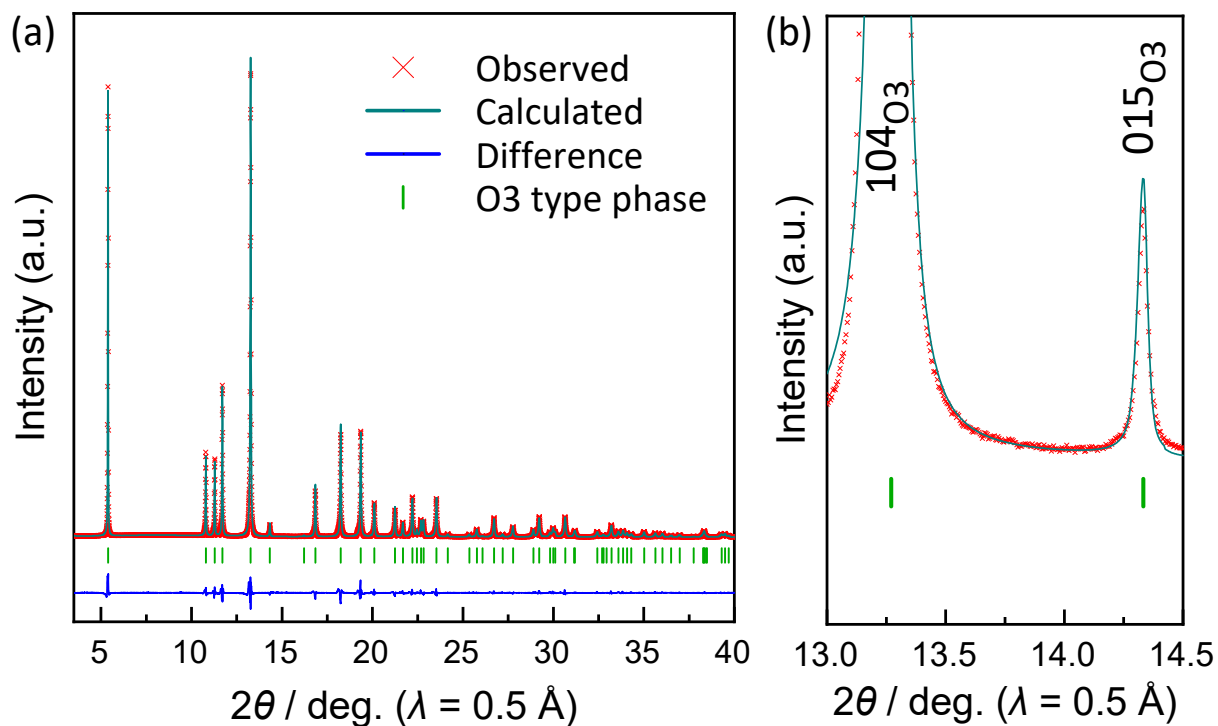

Figure S4 (a) Rietveld refinement results on the synchrotron XRD pattern of as-prepared Ti-sub. (b) Magnified patterns in the diffraction angle range of 13.0° – 14.5°.

Table S3 Refined structural parameters of as-prepared Ti-sub by Rietveld method on the synchrotron XRD pattern.

---

$R_{wp} = 8.35\%$ ,  $R_e = 2.12\%$   
 Space group:  $R\bar{3}m$   
 $a = 2.97512(3) \text{ \AA}$ ,  $c = 15.95640(11) \text{ \AA}$ ,  $V = 122.314(2) \text{ \AA}^3$   
 $R_b = 1.06\%$ ,  $R_f = 0.68\%$

---

| Atom | Wyckoff site | x | y | z          | g        | B / Å <sup>2</sup> |
|------|--------------|---|---|------------|----------|--------------------|
| Na   | 3b           | 0 | 0 | 1/2        | 0.922(3) | 0.53(3)            |
| Ni   | 3a           | 0 | 0 | 0          | 1/2      | 0.354(10)          |
| Mn   | 3a           | 0 | 0 | 0          | 1/3      | = B(Ni)            |
| Ti   | 3a           | 0 | 0 | 0          | 1/6      | = B(Ni)            |
| O    | 6c           | 0 | 0 | 0.26758(7) | 1.0      | 0.81(3)            |

---

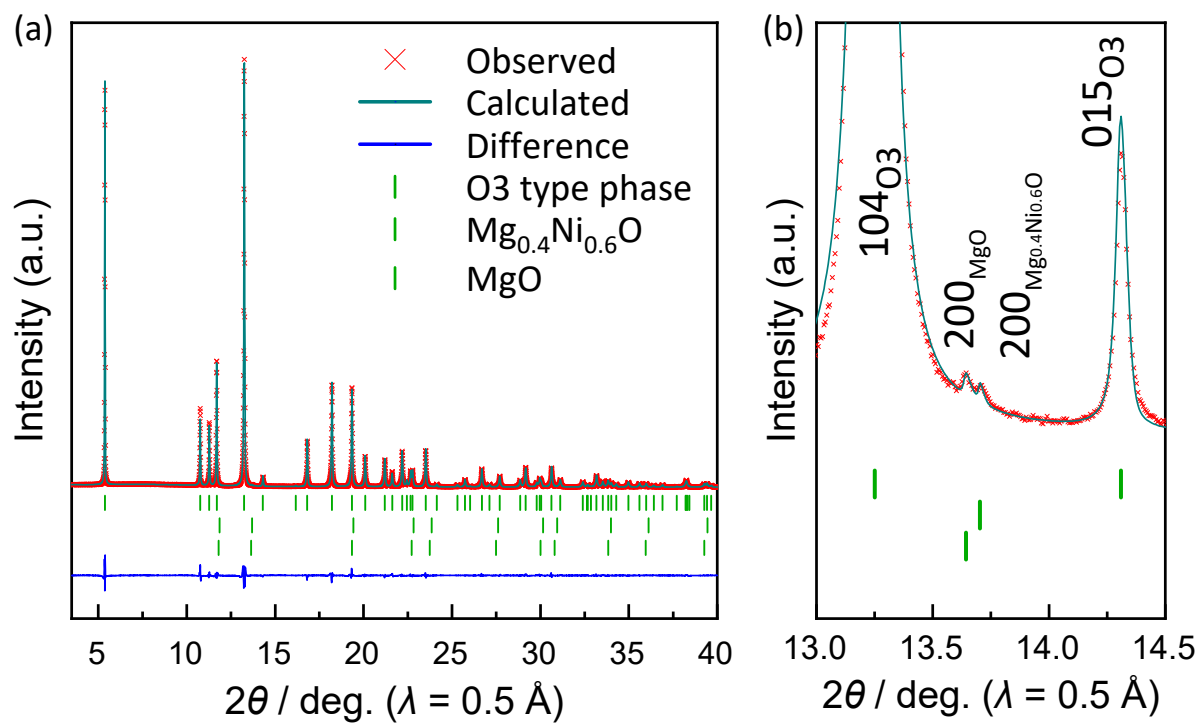

Figure S5 Rietveld refinement results on the synchrotron XRD pattern of as-prepared Mg-Ti-sub. (b) Magnified patterns in the diffraction angle range of  $13.0^\circ - 14.5^\circ$ .

Table S4 Refined structural parameters of as-prepared Mg-Ti-sub by Rietveld method on the synchrotron XRD pattern.

| $R_{wp} = 6.02\%$ , $R_e = 1.63\%$                                                           |              |     |     |            |          |                    |
|----------------------------------------------------------------------------------------------|--------------|-----|-----|------------|----------|--------------------|
| 1 <sup>st</sup> phase: 99.77 mass%                                                           |              |     |     |            |          |                    |
| Space group: $R\bar{3}m$                                                                     |              |     |     |            |          |                    |
| $a = 2.97587(4) \text{ \AA}$ , $c = 15.9922(2) \text{ \AA}$ , $V = 122.649(3) \text{ \AA}^3$ |              |     |     |            |          |                    |
| $R_B = 0.74\%$ , $R_F = 0.56\%$                                                              |              |     |     |            |          |                    |
| Atom                                                                                         | Wyckoff site | $x$ | $y$ | $z$        | $g$      | $B / \text{\AA}^2$ |
| Na                                                                                           | 3b           | 0   | 0   | 1/2        | 0.910(2) | 0.61(3)            |
| Ni                                                                                           | 3a           | 0   | 0   | 0          | 4/9      | 0.33(1)            |
| Mn                                                                                           | 3a           | 0   | 0   | 0          | 1/3      | = $B(\text{Ni})$   |
| Mg                                                                                           | 3a           | 0   | 0   | 0          | 1/18     | = $B(\text{Ni})$   |
| Ti                                                                                           | 3a           | 0   | 0   | 0          | 1/6      | = $B(\text{Ni})$   |
| O                                                                                            | 6c           | 0   | 0   | 0.26771(6) | 1.0      | 0.87(2)            |
| 2 <sup>nd</sup> phase: 0.17 mass%                                                            |              |     |     |            |          |                    |
| Space group: $Fm\bar{3}m$                                                                    |              |     |     |            |          |                    |
| $a = 4.190(1) \text{ \AA}$ , $V = 73.57(3) \text{ \AA}^3$                                    |              |     |     |            |          |                    |
| $R_B = 1.04\%$ , $R_F = 0.60\%$                                                              |              |     |     |            |          |                    |
| Atom                                                                                         | Wyckoff site | $x$ | $y$ | $z$        | $g$      | $B / \text{\AA}^2$ |
| Mg                                                                                           | 4a           | 0   | 0   | 0.0        | 0.4      | 0.3                |
| Ni                                                                                           | 4a           | 0   | 0   | 0.0        | 0.6      | 0.3                |
| O                                                                                            | 4b           | 1/2 | 1/2 | 1/2        | 1.0      | 0.4                |
| 3 <sup>rd</sup> phase: 0.06 mass%                                                            |              |     |     |            |          |                    |
| Space group: $Fm\bar{3}m$                                                                    |              |     |     |            |          |                    |
| $a = 4.209(1) \text{ \AA}$ , $V = 74.54(4) \text{ \AA}^3$                                    |              |     |     |            |          |                    |
| $R_B = 0.87\%$ , $R_F = 0.48\%$                                                              |              |     |     |            |          |                    |
| Atom                                                                                         | Wyckoff site | $x$ | $y$ | $z$        | $g$      | $B / \text{\AA}^2$ |
| Mg                                                                                           | 4a           | 0   | 0   | 0.0        | 1.0      | 0.3                |
| O                                                                                            | 4b           | 1/2 | 1/2 | 1/2        | 1.0      | 0.4                |



Table S5 ICP-AES results for as-prepared  $\text{Na}[\text{Ni}_{1/2-x}\text{Mn}_{1/2-y}\text{Mg}_x\text{Ti}_y]\text{O}_2$  samples.

| Sample name | Targeted composition                                                                    | Molar elemental ratio determined by ICP-AES |      |      |      |      |
|-------------|-----------------------------------------------------------------------------------------|---------------------------------------------|------|------|------|------|
|             |                                                                                         | Na                                          | Ni   | Mn   | Mg   | Ti   |
| Non-sub     | $\text{Na}[\text{Ni}_{0.5}\text{Mn}_{0.5}]\text{O}_2$                                   | 1.04                                        | 0.48 | 0.52 | -    | -    |
| Mg-sub      | $\text{Na}[\text{Ni}_{0.44}\text{Mn}_{0.5}\text{Mg}_{0.06}]\text{O}_2$                  | 1.06                                        | 0.44 | 0.52 | 0.04 | -    |
| Ti-sub      | $\text{Na}[\text{Ni}_{0.5}\text{Mn}_{0.33}\text{Ti}_{0.17}]\text{O}_2$                  | 1.09                                        | 0.50 | 0.34 | -    | 0.16 |
| Mg-Ti-sub   | $\text{Na}[\text{Ni}_{0.44}\text{Mn}_{0.33}\text{Mg}_{0.06}\text{Ti}_{0.17}]\text{O}_2$ | 1.09                                        | 0.45 | 0.36 | 0.03 | 0.17 |

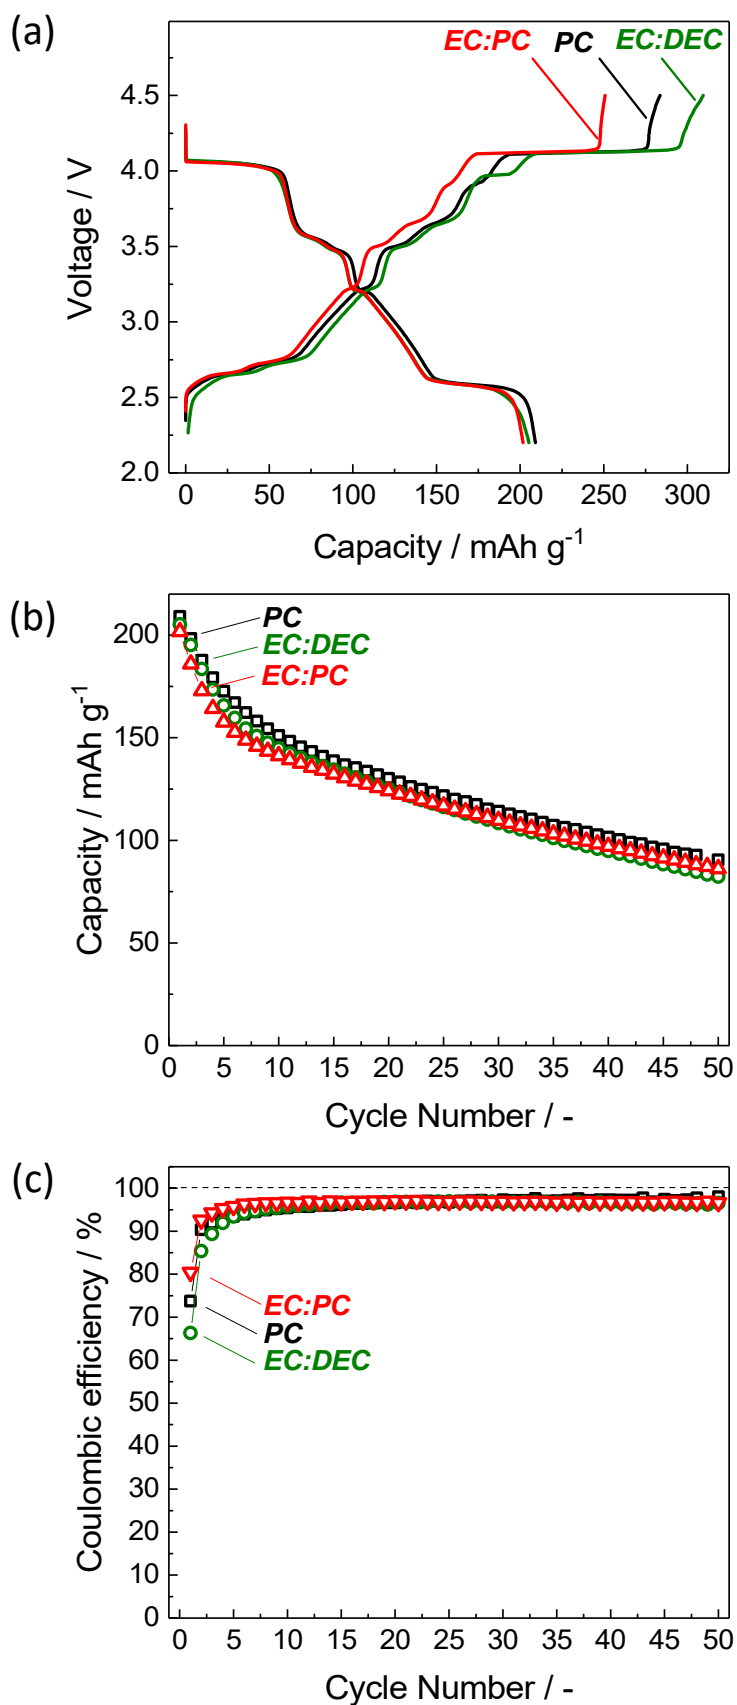

Figure S6 Electrolyte solvent dependency: (a) initial charge-discharge curves and (b) discharge capacities and (c) Coulombic efficiencies of Non-sub electrodes in non-aqueous Na cells filled with 1.0 mol dm<sup>-3</sup> NaPF<sub>6</sub> dissolved in EC:DEC (1:1 v/v), EC:PC (1:1 v/v), or PC.

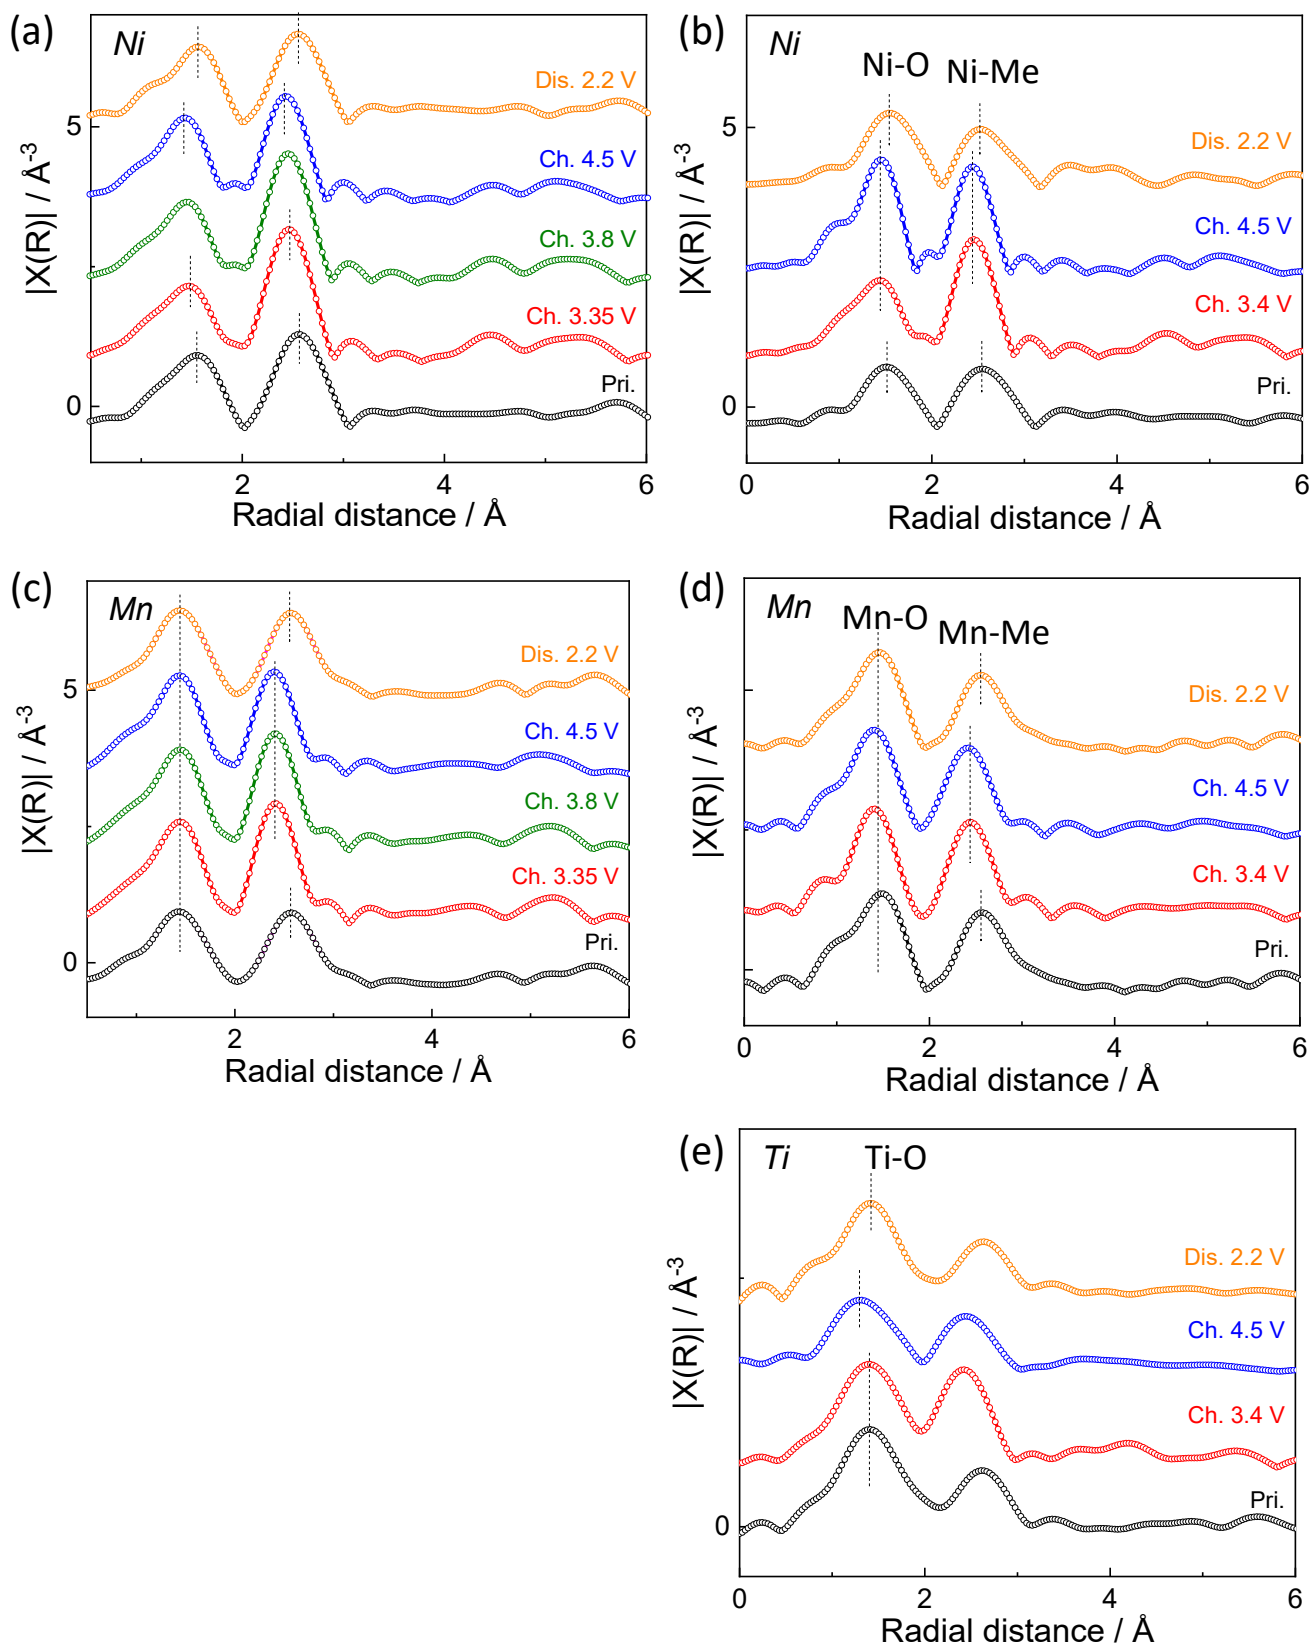

Figure S7 *Ex situ* Fourier-transformed (a, b) Ni K-edge, (c, d) Mn K-edge, and (e) Ti K-edge EXAFS spectra of (a, c) Non-sub and (b, d, e) Mg-Ti-sub electrodes. The tested electrodes were prepared by charging and discharging in Na cells followed by taking the electrodes from the cells.

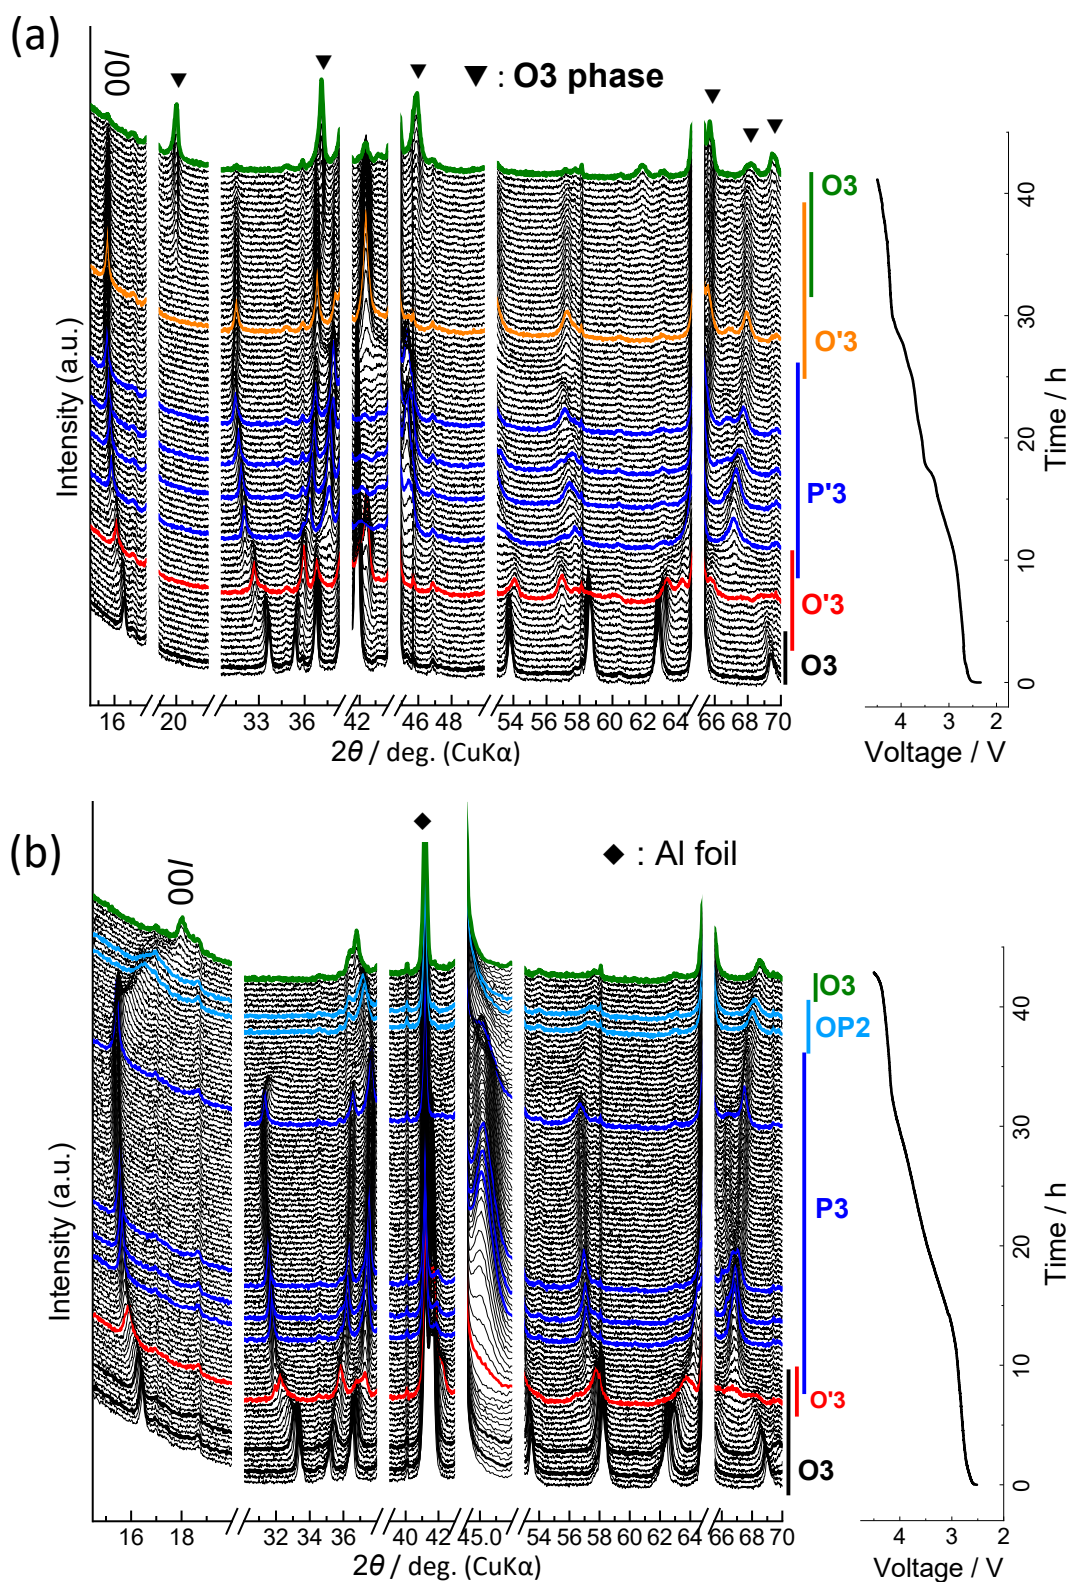

Figure S8 *Operando* XRD patterns of (a) Non-sub and (b) Mg-Ti-sub during initial charging to 4.5 V. Magnified patterns of the thick lines are shown in Fig. S9 with the peak intensities of an Al-coated Be window and an Al current collector subtracted.

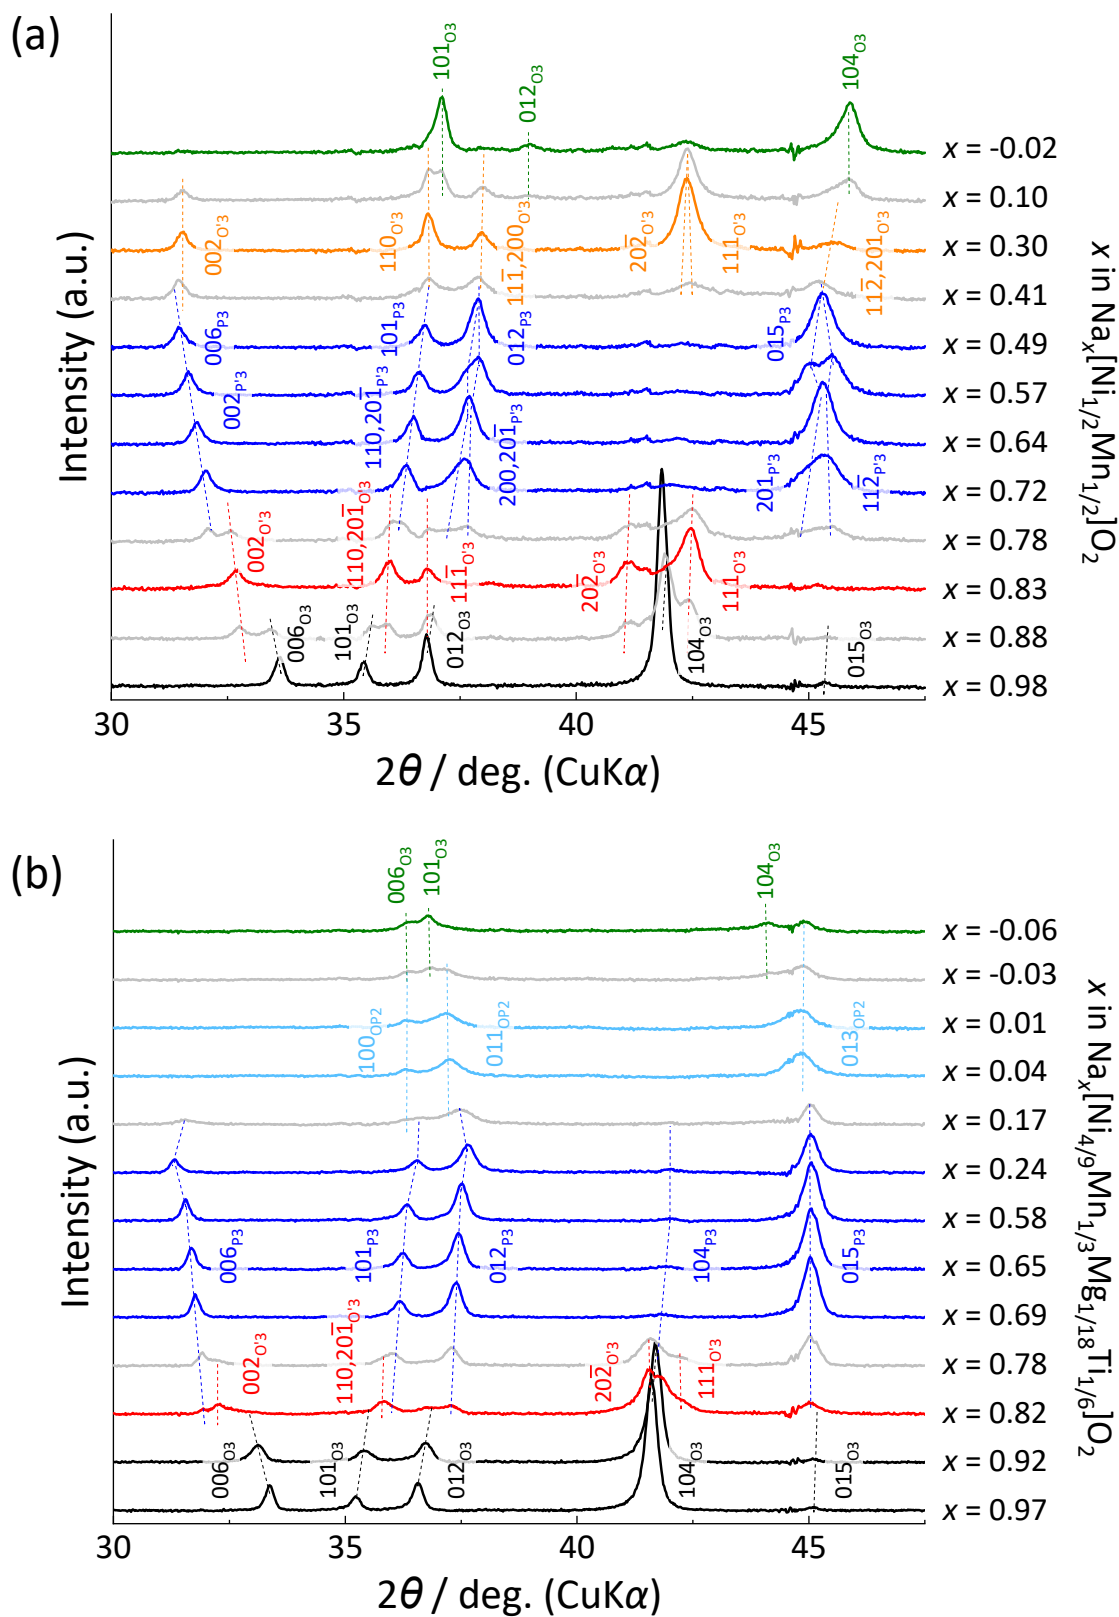

Figure S9 Selected *operando* XRD patterns of (a) Non-sub and (b) Mg-Ti-sub during initial charging to 4.5 V. The peak intensities for an Al-coated Be window and an Al current collector are subtracted from the original patterns of Fig. S8.

Table S6 Rietveld refinement results for the *ex situ* synchrotron XRD pattern of the Non-sub electrode charged to 3.35 V.

---

$R_{wp} = 6.47\%$ ,  $R_e = 2.19\%$   
 Space group:  $P2_1/m$   
 $a = 4.9527(3) \text{ \AA}$ ,  $b = 5.7081(2) \text{ \AA}$ ,  $c = 5.8405(2) \text{ \AA}$ ,  $\beta = 105.708(4)^\circ$ ,  $V = 158.95(1) \text{ \AA}^3$   
 $R_B = 1.12\%$ ,  $R_F = 0.59\%$

---

| Atom | Wyckoff site | x              | y   | z         | g                  | B / $\text{\AA}^2$ |
|------|--------------|----------------|-----|-----------|--------------------|--------------------|
| Na1  | 2e           | 0.712(1)       | 1/4 | 0.5089(8) | 0.76(1)            | 1.5                |
| Na2  | 4f           | = x(Na1) - 1/2 | 0   | = z(Na1)  | = 1/2 - 1/2*g(Na1) | 1.5                |
| Ni1  | 2a           | 0              | 0   | 0         | 0.5                | 0.12(2)            |
| Mn1  | 2a           | 0              | 0   | 0         | 0.5                | = B(Ni1)           |
| Ni2  | 2e           | 1/2            | 1/4 | 0.0117(6) | 0.5                | = B(Ni1)           |
| Mn2  | 2e           | 1/2            | 1/4 | = z(Ni2)  | 0.5                | = B(Ni1)           |
| O1   | 2e           | 0.878(3)       | 1/4 | 0.144(2)  | 1                  | 0.66(6)            |
| O2   | 2e           | 0.130(3)       | 1/4 | 0.827(2)  | 1                  | = B(O1)            |
| O3   | 4f           | 0.386(2)       | 0   | 0.195(1)  | 1                  | = B(O1)            |

---

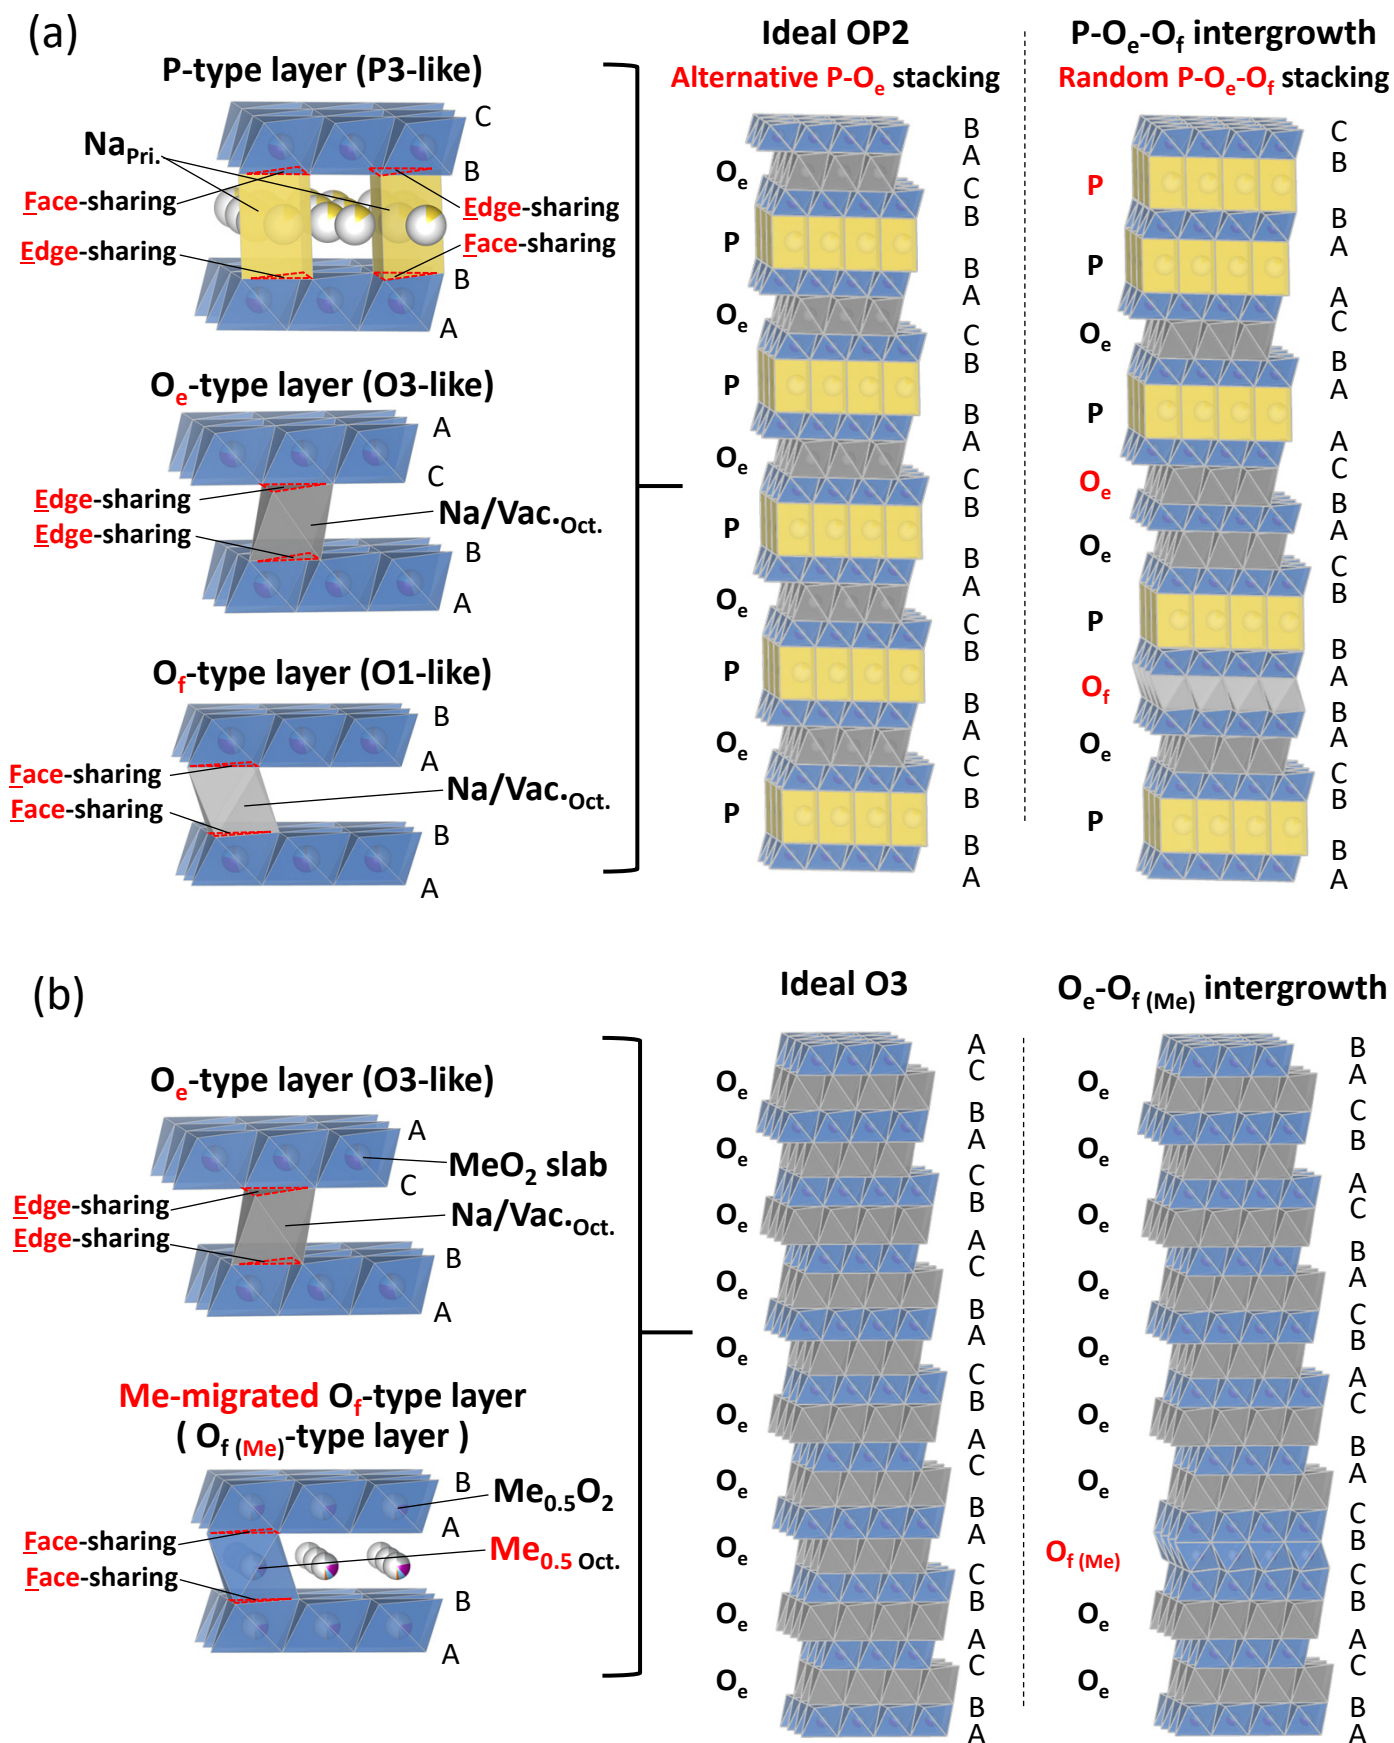

Figure S10 Schematic illustrations of structural models with stacking faults for (a) P-O<sub>e</sub>-O<sub>f</sub> phase and (b) O<sub>e</sub>-O<sub>f</sub>(Me) phase and layer components.



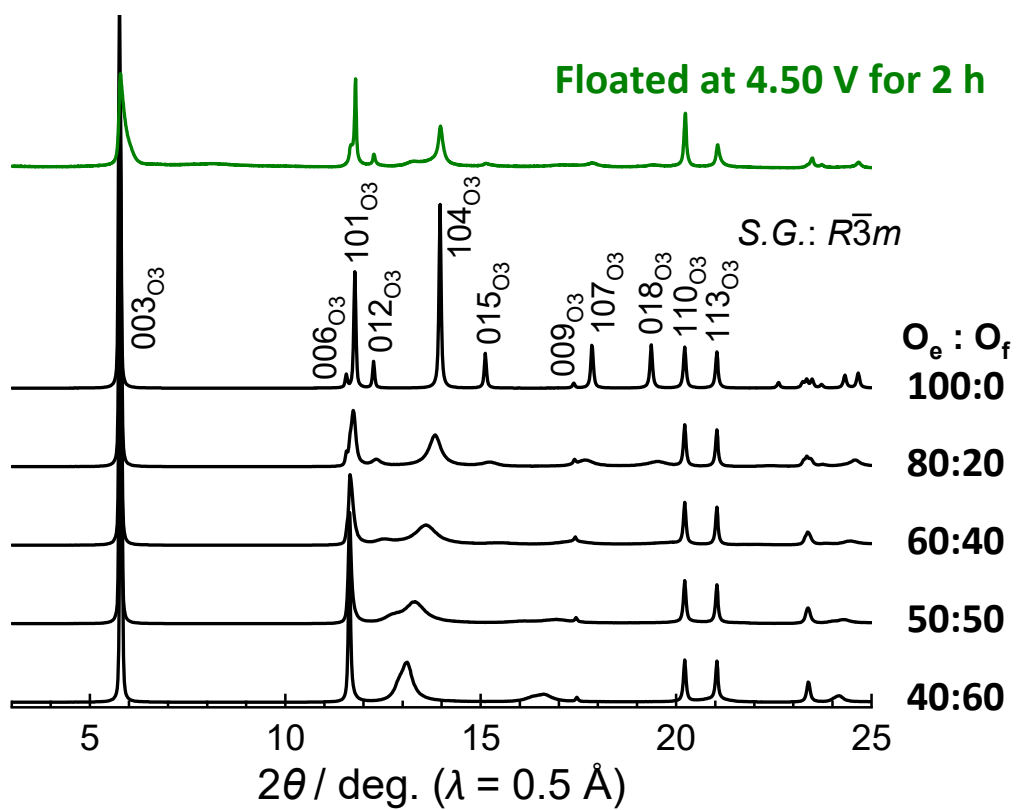

Figure S11 Simulated XRD patterns of  $O_e$ - $O_f$  type stacking faulted structures in comparison to the observed ones in the charged state of 4.50 V.



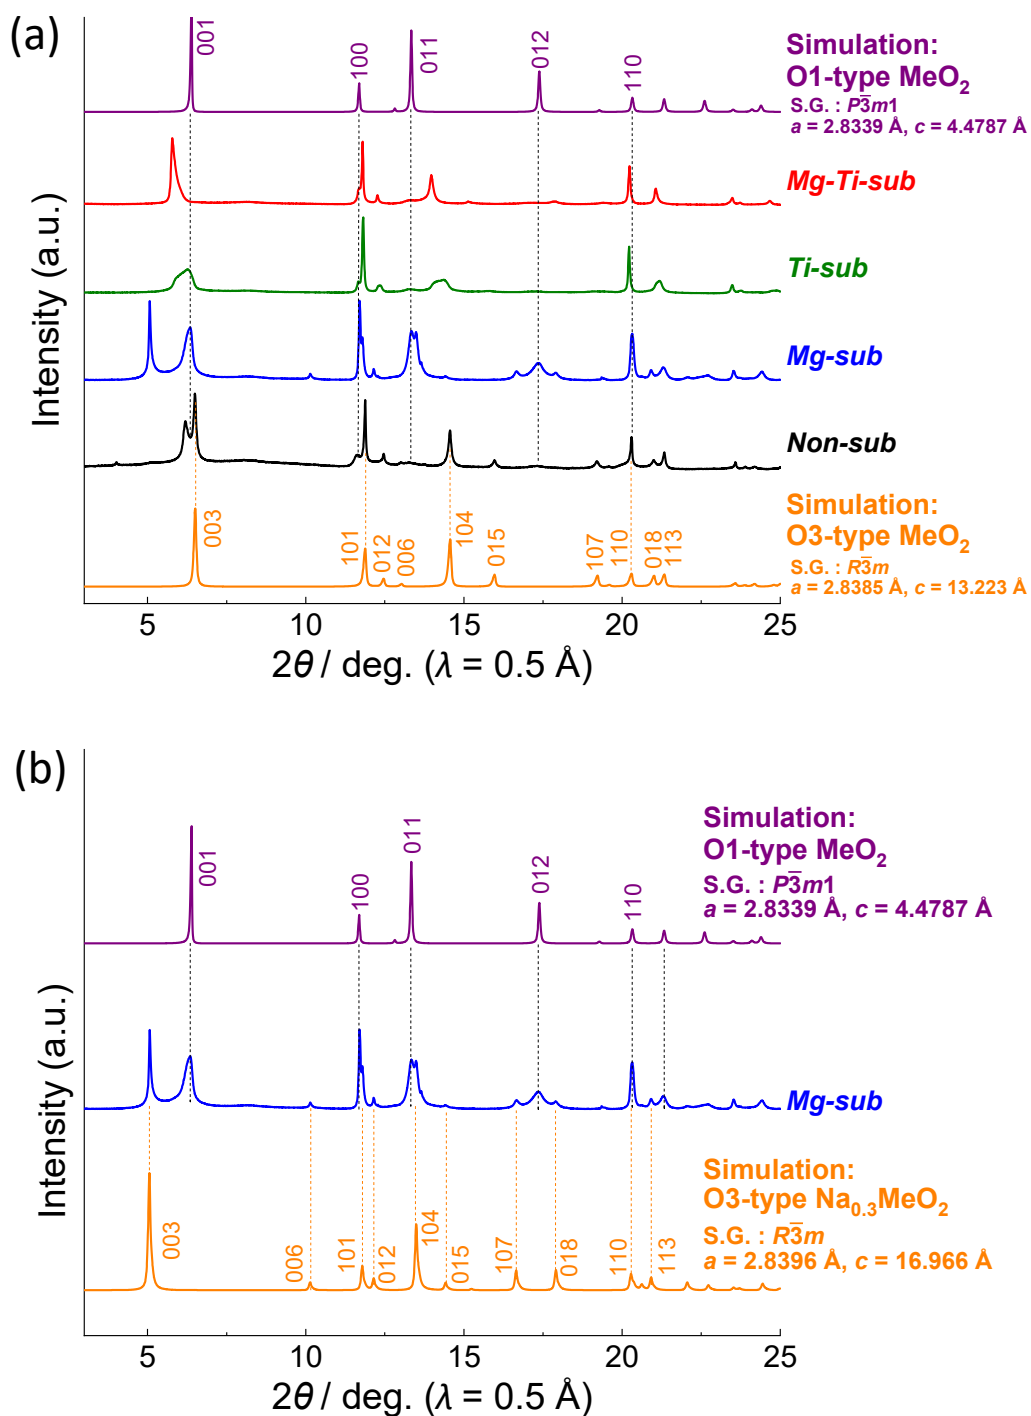

Figure S12 (a) *Ex situ* synchrotron XRD patterns of Non-sub, Mg-sub, Ti-sub, and Mg-Ti-sub electrodes after charging to 4.5 V and floating for 2 h. (b) Comparison of *ex situ* synchrotron XRD pattern for Mg-sub and with simulated patterns of O1 and O3 type structures.

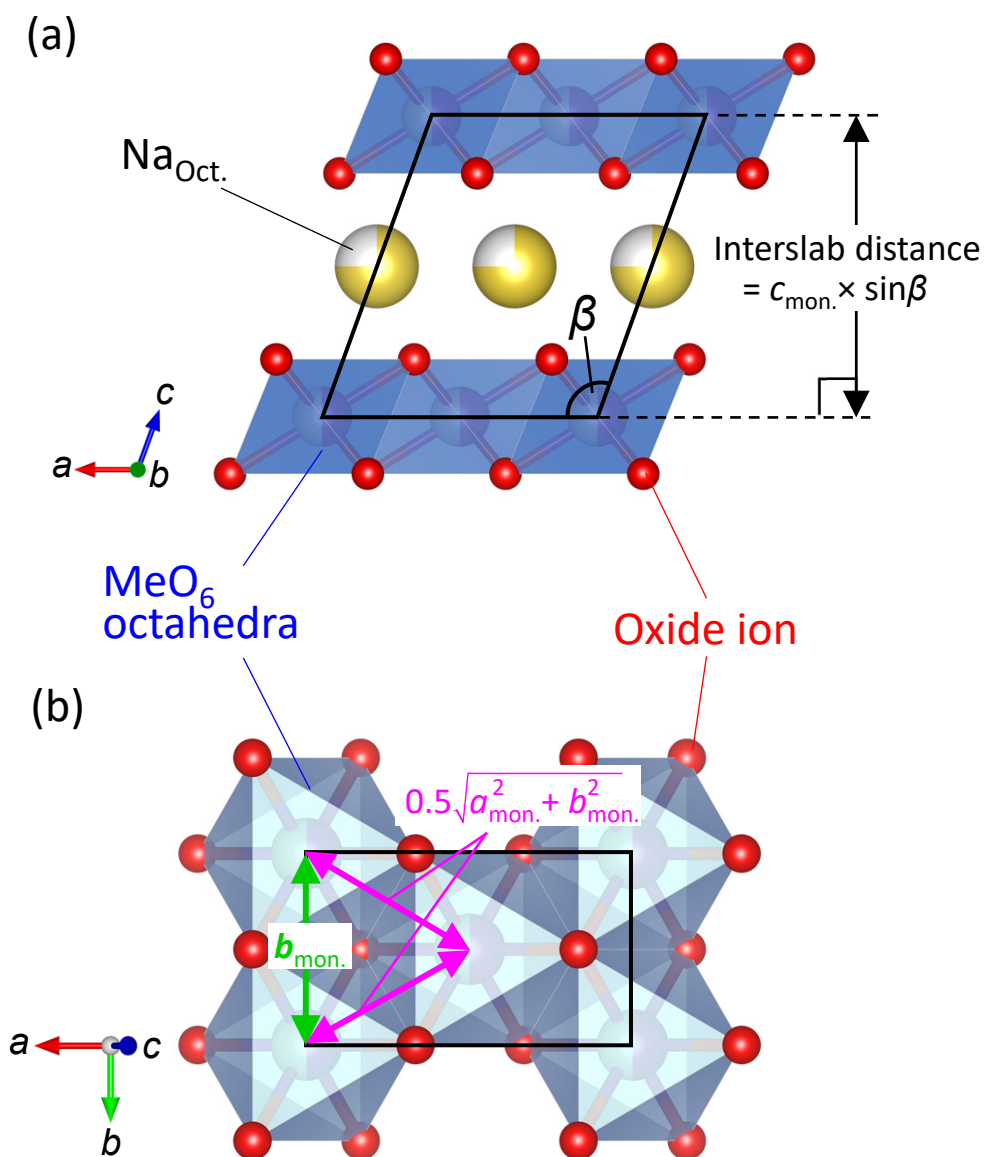

Figure S13 Schematic illustrations of a monoclinic O'3 type structure: (a) a layered structure and interslab distance and (b) an in-plane structure and Me-Me distances.
